# Supplementary material for: Understanding pre-hospital blood transfusion decision-making for injured patients: an interview study
Source: PubMed Central journal article supplement (PMC10646861; doi:10.1136/emermed-2023-213086), 2023-09-13
Supplement: emermed-2023-213086supp002.pdf [file emermed-2023-213086supp002.pdf]

**Table S2: Interview guide questions**

|                        | Questions                                                                                                                                                                                                                                                                                                                                                                                                                                                                                                                                                                                                                                                                                                                                                                                                                                                                                                                                                                                                                 |
|------------------------|---------------------------------------------------------------------------------------------------------------------------------------------------------------------------------------------------------------------------------------------------------------------------------------------------------------------------------------------------------------------------------------------------------------------------------------------------------------------------------------------------------------------------------------------------------------------------------------------------------------------------------------------------------------------------------------------------------------------------------------------------------------------------------------------------------------------------------------------------------------------------------------------------------------------------------------------------------------------------------------------------------------------------|
| Clinician Demographics | <p>What is your base speciality?</p> <p>How many years' experience do you have as a pre-hospital consultant?</p>                                                                                                                                                                                                                                                                                                                                                                                                                                                                                                                                                                                                                                                                                                                                                                                                                                                                                                          |
| Introduction           | <p>I would like you to consider your approach to how you assess, and decide treatments for, trauma patients you see in your pre-hospital clinical role. I'm going to ask you about bleeding. Would that be alright?</p>                                                                                                                                                                                                                                                                                                                                                                                                                                                                                                                                                                                                                                                                                                                                                                                                   |
| Interview Questions    | <p>Is it a fair assumption to suggest you assess a trauma patient for bleeding?</p> <p>When do you start thinking about whether or not a patient might be bleeding?</p> <p>What do you think are the most important clinical pieces of information you use to assess a patient's severity of bleeding?</p> <p>How does hypovolaemic shock change your management for a patient?</p> <p>What is your intention when giving blood?</p> <p>Can we discuss damage control resuscitation?</p> <p>Do you think you practice damage-control resuscitation (DCR) pre-hospital?</p> <p>When do you think DCR becomes necessary pre-hospital?</p> <p>What are the components of your Pre-hospital DCR?</p> <p>What influences your decision to transfuse pre-hospital blood?</p> <p>What is difficult about deciding if a patient needs a transfusion?</p> <p>What do you consider a greater risk to a patient: under transfusion of a bleeding patient or unnecessary transfusion to a patient without significant blood loss?</p> |
