# Supplementary material for: Understanding pre-hospital blood transfusion decision-making for injured patients: an interview study
Source: PubMed Central journal article supplement (PMC10646861; doi:10.1136/emermed-2023-213086), 2023-09-13
Supplement: emermed-2023-213086supp003.pdf [file emermed-2023-213086supp003.pdf]

**Table S3: The hateful eight; factors suggestive of major haemorrhage**

| Factor suggestive of major bleeding                  | Type of Factor       | Source                        |
|------------------------------------------------------|----------------------|-------------------------------|
| Pale                                                 | Qualitative          | Visual inspection             |
| Clammy                                               | Qualitative          | Visual inspection / palpation |
| Apparent air-hunger (change in respiratory pattern)  | Qualitative          | Visual inspection             |
| Venous collapse                                      | Qualitative          | Visual inspection             |
| Hypotension (low volume or absent peripheral pulses) | Qualitative          | Palpation                     |
| Low or falling end tidal CO <sub>2</sub>             | Quantitative / trend | Electronic monitoring         |
| Tachycardia or relative bradycardia                  | Quantitative         | Electronic monitoring         |
| Altered mentation                                    | Qualitative          | Inspection                    |
